# Supplementary material for: 3D hierarchically porous zinc–nickel–cobalt oxide nanosheets grown on Ni foam as binder-free electrodes for electrochemical energy storage
Source: Royal Society of Chemistry journal article supplement (doi:10.1039/c5ta07258a), 2015-01-01
Supplement: c5ta07258a1.pdf [file c5ta07258a1.pdf]

## Supporting information

### **3D Hierarchical Porous Zinc-Nickel-Cobalt Oxides Nanosheets Grown on Ni Foam as Binder-Free Electrodes for Electrochemical Energy Storage**

Huixin Chen <sup>a, 1</sup>, Qiaobao Zhang <sup>b, d, 1</sup>, Xiang Han <sup>c</sup>, Junjie Cai <sup>b</sup>, Meilin Liu <sup>d</sup>, Yong Yang <sup>a, \*</sup>, Kaili Zhang <sup>b, \*</sup>

<sup>a</sup> State Key Laboratory for Physical Chemistry of Solid Surfaces, Department of Chemistry, Xiamen University, Xiamen, 361005, P. R. China

<sup>b</sup> Department of Mechanical and Biomedical Engineering, City University of Hong Kong, 83 Tat Chee Avenue, Kowloon, Hong Kong

<sup>c</sup> Semiconductor Photonics Research Center, Department of Physics, Xiamen University, Xiamen, 361005, P. R. China

<sup>d</sup> School of Materials Science and Engineering, Georgia Institute of Technology, 771 Ferst Drive, Atlanta 30332-0245, GA, United States

<sup>1</sup> These authors contributed equally to this work

\*Corresponding authors:

Yong Yang, E-mail address: [yyang@xmu.edu.cn](mailto:yyang@xmu.edu.cn)

Kaili Zhang, E-mail address: [kaizhang@cityu.edu.hk](mailto:kaizhang@cityu.edu.hk)

The crystal phase of the as-synthesized ZNCO-precursor nanosheets on Ni foam was determined by X-ray diffraction (XRD) with the result shown in Figure S1. Besides from the three strong peaks from Ni foam substrate, all the identified peaks can be assigned to pure orthorhombic cobalt carbonate hydroxide (PDF#48-0083), indicating that the Ni and Zn co-incorporated in the host layer of cobalt carbonate hydroxide to form ZNCO carbonate hydroxides has no effect on the crystal structure of cobalt carbonate hydroxide.

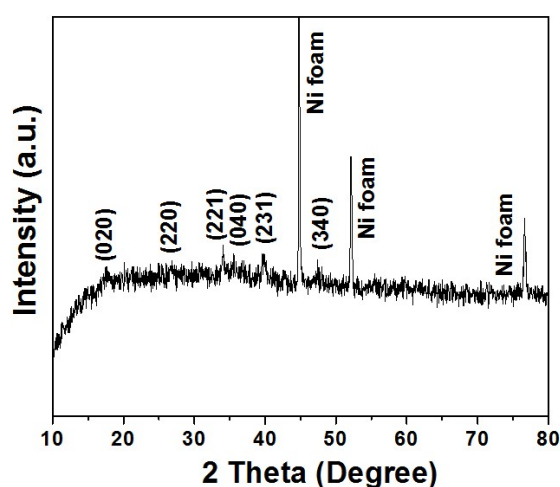

**Figure S1** XRD pattern of ZNCO-precursor nanosheets on Ni foam.

**Table S1** ICP-MS results of Ni/Zn/Co molar ratio of ZNCO nanosheets

| Element | Mas concentration (ug/mL) | Molar concentration (umol/mL) |
|---------|---------------------------|-------------------------------|
| Ni      | 11.3                      | 0.193                         |
| Zn      | 12.8                      | 0.196                         |
| Co      | 24.9                      | 0.42                          |

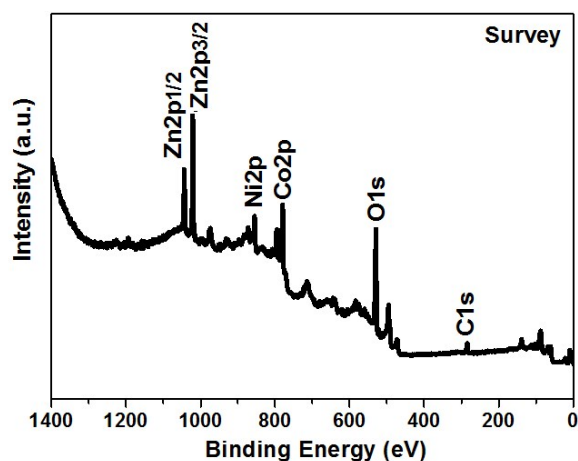

**Figure S2** XPS survey spectrum of ZNCO nanosheets.

The ZNCO nanosheets powder was obtained by thermally converted from their corresponding ZNCO-precursor nanosheets, which were collected from the precipitates at the bottom of beaker resulted from the reacted solution by centrifugation. Figure S3 shows the SEM images of off-substrate ZNCO nanosheets. From Figure S3(a-b), we can see that they show a flower-like shape composed of interconnected ultrathin nanosheets with enough space between each other. Figure S3(c) and (d) shows the typical discharge-charge voltage profiles for the first, second, third and 50th cycles and cycle performance of ZNCO nanosheets pasted electrode at a current density of  $0.1 \text{ Ag}^{-1}$ , respectively. As shown in Figure S3(d), the ZNCO nanosheets pasted electrode demonstrates bad cycling performance with the capacity faded very quickly from the first cycle. This may due to a fact that a pasted electrode cannot ensure the direct contact of the active material with the current collector or preserve the quality of the adhesion if the binder and conductive additive are subjected to cyclical changes in the volume, stress, and strain of the active material. The randomness in the arrangement of the hierarchical structures also increased the diffusion lengths for electrons and  $\text{Li}^+$ . Additionally, the presence of binder could also

impede electron conduction between the active material and the current collector because most binders with good adhesion properties are electron insulators.

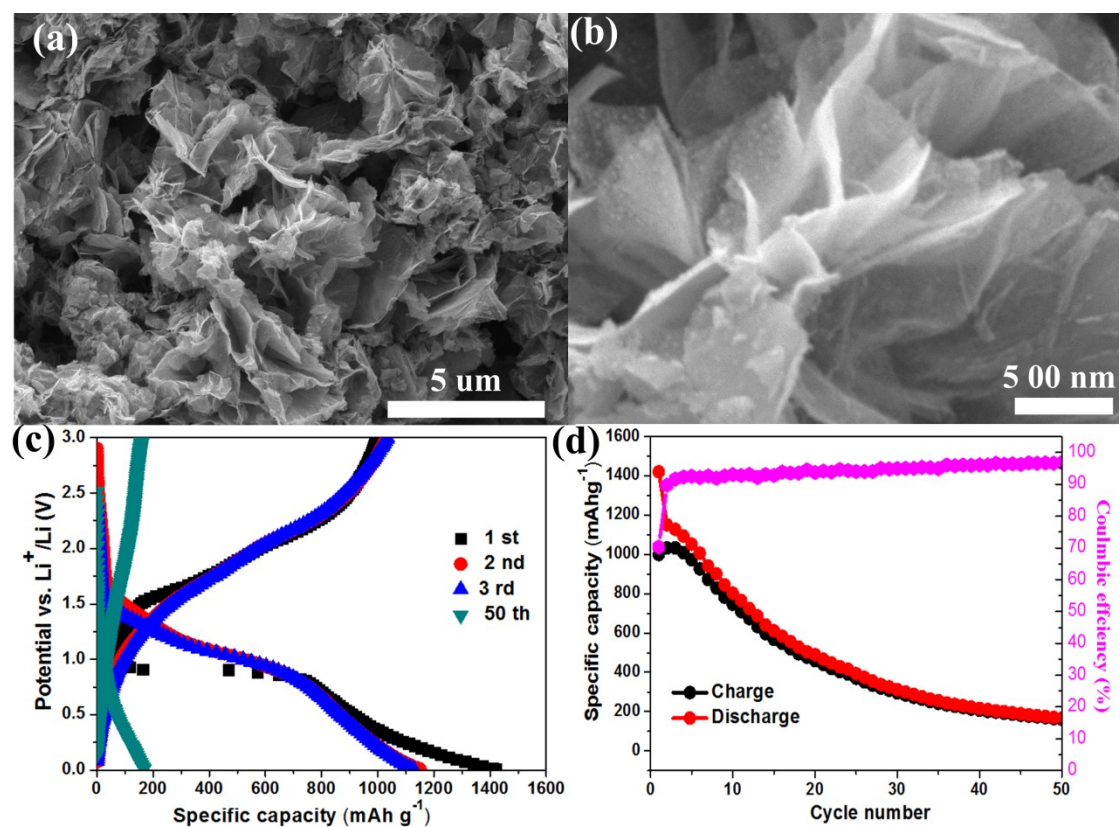

**Figure S3** (a-b) SEM images of off-substrate ZNCO nanosheets, (c) typical discharge-charge voltage profiles for the first, second, third and 50th cycles and (d) cycling performance of ZNCO nanosheets pasted electrode at current density of 0.1 Ag<sup>-1</sup>.

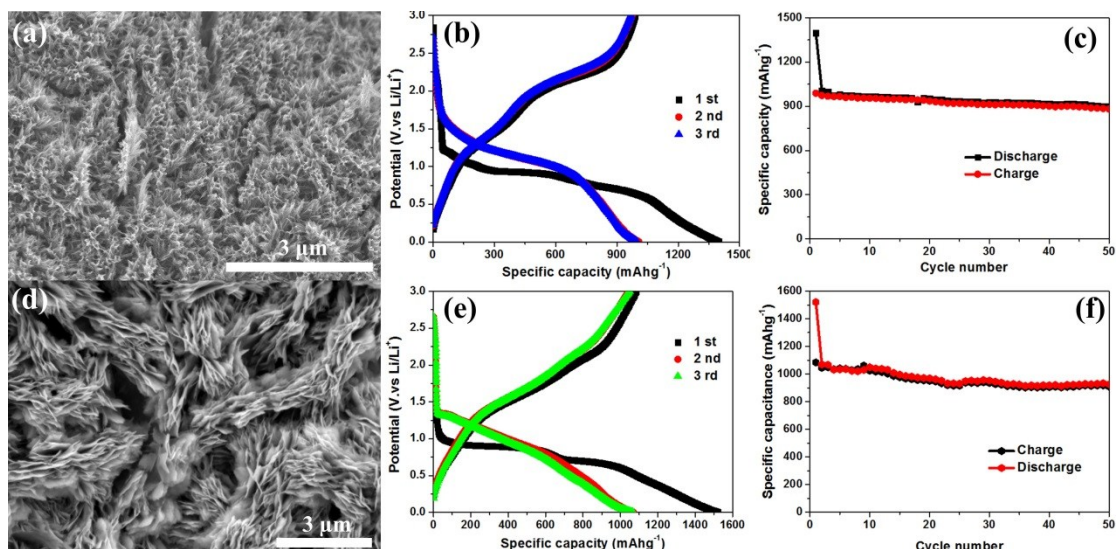

**Figure S4.** (a) SEM image of NiCo<sub>2</sub>O<sub>4</sub> (NCO) nanosheets on Ni foam, (b) Discharge/charge profiles of as-prepared NCO nanosheets electrodes in the 1st, 2 nd and 3 rd cycles at a constant current of 200 mA g<sup>-1</sup> and (c) its corresponding cycling performance at current density of 200 mA g<sup>-1</sup>, (d) SEM image of ZnCo<sub>2</sub>O<sub>4</sub> (ZCO) nanosheets on Ni foam, (e) Discharge/charge profiles of as-prepared ZCO nanosheets electrodes in the 1st, 2 nd and 3 rd cycles at a constant current of 200 mA g<sup>-1</sup> and (f) its corresponding cycling performance at current density of 200 mA g<sup>-1</sup>.

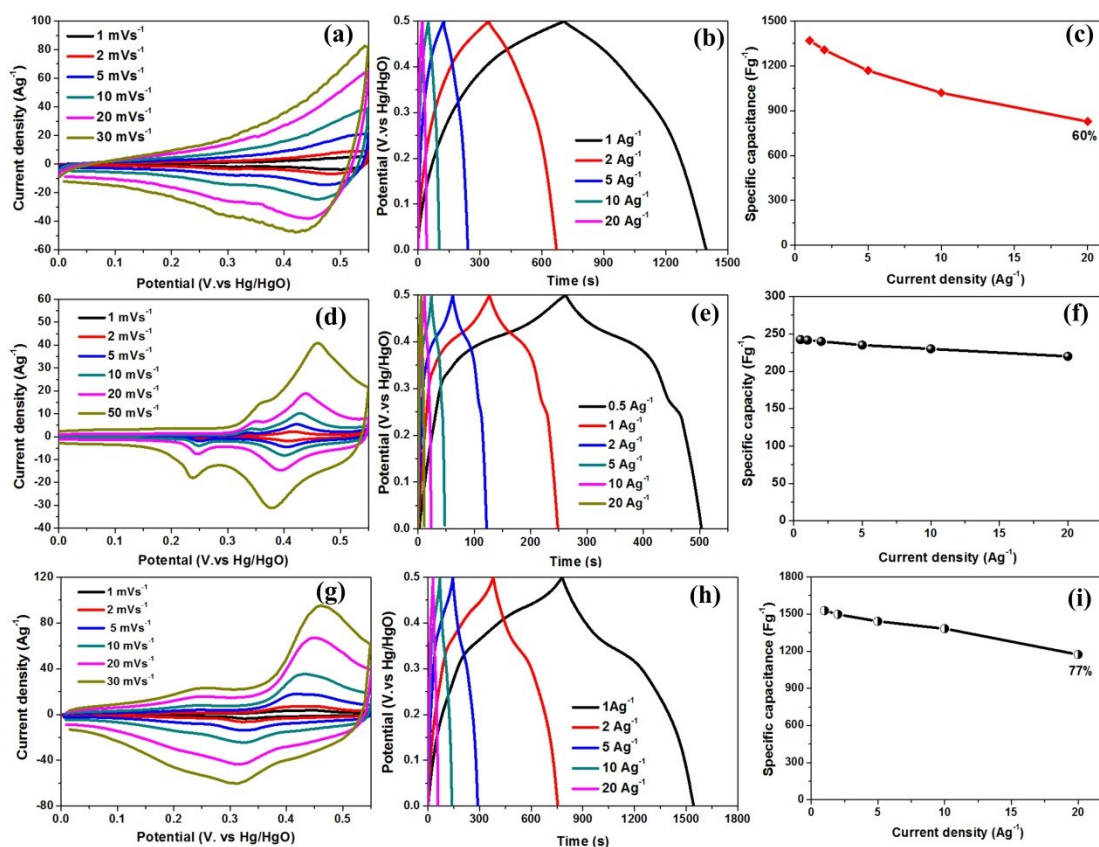

**Figure S5.** (a) CV curves of the ZCO/Ni foam electrode at various scan rates ranging from 1 to 30 mVs<sup>-1</sup>, (b) charge–discharge curves of ZCO/Ni foam electrode at various current densities, and (c) the corresponding capacitance of ZCO/Ni foam electrode as a function of current density, (d) CV curves of the CO/Ni foam electrode at various scan rates ranging from 1 to 50 mVs<sup>-1</sup>, (e) charge–discharge curves of CO/Ni foam electrode at various current densities, and (f) the corresponding capacitance of CO/Ni foam electrode as a function of current density, (g) CV curves of the NCO/Ni foam electrode at various scan rates ranging from 1 to 30 mVs<sup>-1</sup>, (h) charge–discharge curves of NCO/Ni foam electrode at various current densities, and (i) the corresponding capacitance of NCO/Ni foam electrode as a function of current density



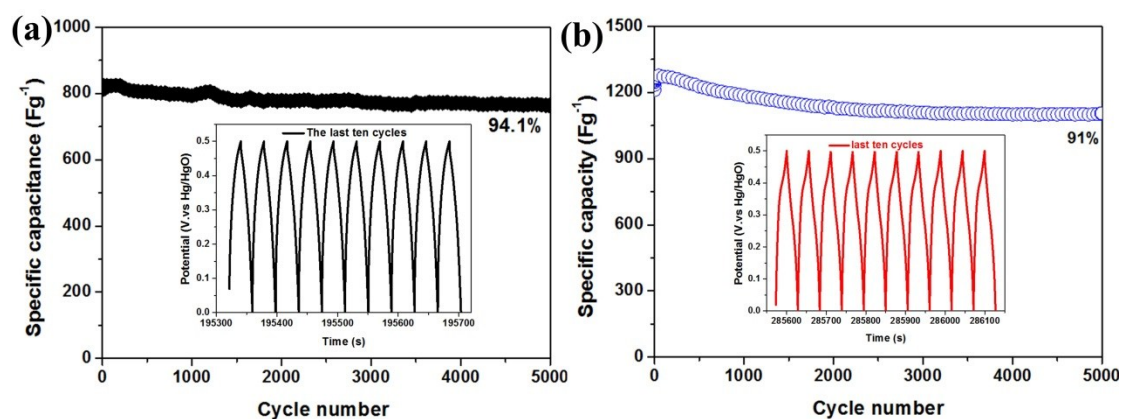

**Figure S6.** Cycling performance of the (a) ZCO nanosheets/Ni foam and (b) NCO nanosheets/Ni foam electrode at current density of  $20 \text{ Ag}^{-1}$  for 5000 cycles, inset is their corresponding charge/ discharge curves of the last ten cycles for the 5000 cycles.

**Table S2** Comparison of electrochemical properties as the anode materials for LIBs between various other TMOs binder-free electrodes reported in the literature and ZNCO nanosheets/Ni foam electrode in this work.

| Other TMOs anodes                                             | Charge capacity ( $\text{mAhg}^{-1}$ )            | Voltage range(V) | Current density ( $\text{mA}\text{g}^{-1}$ ) | References |
|---------------------------------------------------------------|---------------------------------------------------|------------------|----------------------------------------------|------------|
| Nanorod-assembled $\text{Co}_3\text{O}_4$ hexapods/Cu foil    | 800 (after 40cycles)                              | 0.01–3.0         | 100                                          | 1          |
| $\text{Co}_3\text{O}_4$ nanosheets/Ni foam                    | 631 (after 50 cycles)                             | 0.01–3.0         | 150                                          | 2          |
| Leaf-like $\text{ZnCo}_2\text{O}_4$ /Ni foam                  | 1040 (after 60 cycles)                            | 0.01–3.0         | 100                                          | 3          |
| Flower-like $\text{ZnCo}_2\text{O}_4$ nanowires/carbon cotton | 900 (after50cycles)                               | 0.01-3.0         | 200                                          | 4          |
| $\text{NiCo}_2\text{O}_4$ nanosheet/ Reduced Graphene Oxide   | 954 (after 50 cycles)                             | 0.01-3.0         | 200                                          | 5          |
| $\text{NiCo}_2\text{O}_4$ /graphene nanosheets/Ni foam        | 1031 (after 20 cycles)                            | 0.01- 3.0        | 150                                          | 6          |
| NiO nanoflake arrays/Cu foil                                  | 720 (after 20 cycles)                             | 0.01-3.0         | 100                                          | 7          |
| ZNCO nanosheets/Ni foam                                       | 1130 (after 50 cycles)<br>663 (after 1000 cycles) | 0.01-3.0         | 200<br>1000                                  | This work  |

**Table 3** Comparison of electrochemical properties as electrode materials for SCs between various other ZCO, NCO and CO binder-free electrodes reported in the literature and ZNCO nanosheets/Ni foam electrode in this work.

| Electrode materials                 | Capacitance                                                                                  | Capacitance retention                               | Refs             |
|-------------------------------------|----------------------------------------------------------------------------------------------|-----------------------------------------------------|------------------|
| Flowerlike ZCO microspheres/Ni foam | 684.9 Fg <sup>-1</sup> at 1Ag <sup>-1</sup><br>336.6 Fg <sup>-1</sup> at 15 Ag <sup>-1</sup> | 49% from 1Ag <sup>-1</sup> to 15Ag <sup>-1</sup>    | 8                |
| Flower-like NCO/ 3D graphene foam   | 1402 Fg <sup>-1</sup> at 1Ag <sup>-1</sup><br>1080 Fg <sup>-1</sup> at 20 Ag <sup>-1</sup>   | 77% from 1Ag <sup>-1</sup> to 20Ag <sup>-1</sup>    | 9                |
| CO nanowires/Ni foam                | 1160 Fg <sup>-1</sup> at 2Ag <sup>-1</sup><br>820 Fg <sup>-1</sup> at 20 Ag <sup>-1</sup>    | 70% from 2Ag <sup>-1</sup> to 20Ag <sup>-1</sup>    | 10               |
| ZCO nanorods/Ni foam                | 1400 Fg <sup>-1</sup> at 1Ag <sup>-1</sup><br>1015 Fg <sup>-1</sup> at 20 Ag <sup>-1</sup>   | 72.5 % from 1Ag <sup>-1</sup> to 20Ag <sup>-1</sup> | 11               |
| NCO nanoneedles/3D graphene/Ni foam | 1588 Fg <sup>-1</sup> at 1Ag <sup>-1</sup><br>976 Fg <sup>-1</sup> at 20 Ag <sup>-1</sup>    | 61% from 1Ag <sup>-1</sup> to 20Ag <sup>-1</sup>    | 12               |
| NCO nanowires/carbon textiles       | 1283 Fg <sup>-1</sup> at 1Ag <sup>-1</sup><br>1010 Fg <sup>-1</sup> at 20 Ag <sup>-1</sup>   | 79% from 1Ag <sup>-1</sup> to 20Ag <sup>-1</sup>    | 13               |
| ZCO nanoflakes/Ni foam              | 1220 Fg <sup>-1</sup> at 2Ag <sup>-1</sup><br>881 Fg <sup>-1</sup> at 10 Ag <sup>-1</sup>    | 72% from 2 Ag <sup>-1</sup> to 10 Ag <sup>-1</sup>  | 14               |
| ZNCO nanosheets/Ni foam             | 1728 Fg <sup>-1</sup> at 1Ag <sup>-1</sup><br>1512 Fg <sup>-1</sup> at 20 Ag <sup>-1</sup>   | 87.5% from 1Ag <sup>-1</sup> to 20Ag <sup>-1</sup>  | <b>This work</b> |

CO: Co<sub>3</sub>O<sub>4</sub>, NCO: NiCo<sub>2</sub>O<sub>4</sub>, ZCO: ZnCo<sub>2</sub>O<sub>4</sub>, ZNCO: Zn<sub>0.75</sub>Ni<sub>0.75</sub>Co<sub>1.5</sub>O<sub>4</sub>

## References

1. L. Wang, B. Liu, S. Ran, H. Huang, X. Wang, B. Liang, D. Chen, and G. Shen, *J. Mater. Chem.*, 2012, **22**, 23541.
2. Y. Fan, H. Shao, J. Wang, L. Liu, J. Zhang, and C. Cao, *Chem. Commun. (Camb)*, 2011, **47**, 3469–71.
3. H. Long, T. Shi, S. Jiang, S. Xi, R. Chen, S. Liu, G. Liao, and Z. Tang, *J. Mater. Chem. A*, 2014, **2**, 3741.



4. S. G. Mohamed, T.-F. Hung, C.-J. Chen, C. K. Chen, S.-F. Hu, R.-S. Liu, K.-C. Wang, X.-K. Xing, H.-M. Liu, A.-S. Liu, M.-H. Hsieh, and B.-J. Lee, *RSC Adv.*, 2013, **3**, 20143.
5. G. Gao, H. Bin Wu, and X. W. D. Lou, *Adv. Energy Mater.*, 2014, DOI:10.1002/aenm.201400422.
6. Y. Chen, J. Zhu, B. Qu, B. Lu, and Z. Xu, *Nano Energy*, 2014, **3**, 88–94.
7. H. Wu, M. Xu, H. Wu, J. Xu, Y. Wang, Z. Peng, and G. Zheng, *J. Mater. Chem.*, 2012, **22**, 19821.
8. W. Fu, X. Li, C. Zhao, Y. Liu, P. Zhang, J. Zhou, X. Pan, and E. Xie, *Mater. Lett.*, 2015, **149**, 1–4.
9. C. Zhang, T. Kuila, N. H. Kim, S. H. Lee, and J. H. Lee, *Carbon N. Y.*, 2015, **89**, 328–339.
10. F. Zhang, C. Yuan, X. Lu, L. Zhang, Q. Che, and X. Zhang, *J. Power Sources*, 2012, **203**, 250–256.
11. B. Liu, B. Liu, Q. Wang, X. Wang, Q. Xiang, D. Chen, and G. Shen, *ACS Appl. Mater. Interfaces*, 2013, **5**, 10011–10017.
12. D. Cai, S. Xiao, D. Wang, B. Liu, L. Wang, Y. Liu, H. Li, Y. Wang, Q. Li, and T. Wang, *Electrochim. Acta*, 2014, **142**, 118–124.
13. L. Shen, Q. Che, H. Li, and X. Zhang, *Adv. Funct. Mater.*, 2013, DOI: 10.1002/adfm.201303138.
14. J. Cheng, Y. Lu, K. Qiu, H. Yan, X. Hou, J. Xu, L. Han, X. Liu, J.-K. Kim, and Y. Luo, *Phys. Chem. Chem. Phys.*, 2015, **17**, 17016–17022.
